# Supplementary material for: Short-term effects of Chlorhexidine mouthwash and Listerine on oral microbiome in hospitalized patients
Source: PubMed Central journal article supplement (PMC9932516; doi:10.3389/fcimb.2023.1056534), 2023-02-02
Supplement: DataSheet_1.pdf [file DataSheet_1.pdf]

## SUPPLEMENTARY MATERIALS

### Supplementary Tables

| PID | sex | age | smoking | alcohol | BMI   | diabetes | cancer | cirrhosis | ESRD | infection |
|-----|-----|-----|---------|---------|-------|----------|--------|-----------|------|-----------|
| C01 | F   | 67  | No      | No      | 28.00 | Yes      | No     | No        | No   | No        |
| C02 | F   | 66  | No      | No      | 24.90 | No       | Yes    | No        | No   | No        |
| C03 | M   | 24  | No      | No      | 19.44 | No       | No     | No        | No   | No        |
| C04 | M   | 63  | No      | No      | 30.57 | No       | No     | No        | No   | No        |
| C05 | M   | 55  | No      | No      | 29.46 | No       | No     | No        | No   | No        |
| C06 | F   | 42  | No      | No      | 37.73 | No       | No     | No        | No   | No        |
| C07 | F   | 76  | No      | No      | 23.60 | No       | No     | No        | No   | Yes       |
| C08 | M   | 78  | No      | No      | 17.99 | Yes      | No     | No        | Yes  | No        |
| C09 | F   | 67  | No      | No      | 29.20 | Yes      | No     | No        | No   | Yes       |
| C10 | M   | 78  | No      | No      | 20.95 | No       | No     | No        | No   | No        |
| C11 | M   | 52  | Yes     | Yes     | 30.34 | No       | No     | No        | No   | Yes       |
| C12 | M   | 76  | No      | No      | 21.18 | No       | Yes    | No        | No   | Yes       |
| C13 | F   | 58  | No      | No      | 20.77 | Yes      | No     | No        | No   | Yes       |
| C14 | M   | 61  | No      | No      | 26.95 | No       | No     | No        | No   | Yes       |
| C15 | F   | 79  | No      | No      | 35.26 | Yes      | No     | No        | No   | Yes       |
| C16 | F   | 72  | No      | No      | 16.67 | No       | Yes    | No        | Yes  | Yes       |
| C17 | M   | 70  | No      | No      | 29.30 | No       | No     | No        | No   | Yes       |
| C18 | F   | 87  | No      | No      | 23.05 | Yes      | No     | Yes       | No   | Yes       |
| C19 | M   | 52  | Yes     | No      | 22.69 | No       | Yes    | No        | No   | Yes       |
| C20 | M   | 62  | No      | No      | 22.23 | Yes      | Yes    | Yes       | No   | No        |
| C21 | M   | 70  | No      | No      | 29.24 | No       | No     | No        | No   | Yes       |
| C22 | M   | 53  | No      | No      | 25.65 | Yes      | No     | No        | No   | No        |
| C23 | M   | 78  | Yes     | No      | 25.86 | No       | No     | No        | No   | No        |
| C24 | M   | 59  | No      | No      | 28.65 | No       | Yes    | Yes       | No   | No        |
| C25 | M   | 65  | No      | Yes     | 30.76 | Yes      | No     | No        | No   | No        |
| C26 | F   | 83  | No      | No      | 24.64 | No       | No     | No        | No   | Yes       |
| C27 | M   | 62  | Yes     | No      | 17.27 | Yes      | No     | No        | No   | No        |
| C28 | M   | 66  | No      | Yes     | 29.32 | Yes      | Yes    | No        | No   | Yes       |
| L01 | M   | 84  | No      | No      | 21.95 | No       | No     | Yes       | No   | Yes       |
| L02 | F   | 64  | No      | No      | 24.55 | No       | No     | No        | No   | Yes       |
| L03 | F   | 45  | Yes     | No      | 21.38 | No       | No     | No        | No   | No        |
| L04 | F   | 64  | No      | No      | 23.29 | Yes      | No     | No        | No   | No        |
| L05 | M   | 59  | Yes     | No      | 28.62 | No       | No     | No        | No   | Yes       |
| L06 | F   | 72  | No      | No      | 23.15 | No       | No     | No        | No   | No        |
| L07 | M   | 76  | No      | No      | 21.77 | Yes      | No     | No        | No   | No        |
| L08 | M   | 61  | No      | No      | 26.91 | No       | No     | Yes       | No   | No        |
| L09 | M   | 83  | No      | No      | 23.57 | No       | No     | No        | No   | Yes       |
| L10 | F   | 60  | Yes     | No      | 22.13 | No       | Yes    | No        | No   | Yes       |
| L11 | M   | 62  | No      | No      | 22.46 | No       | No     | No        | No   | No        |
| L12 | M   | 60  | Yes     | No      | 27.00 | Yes      | Yes    | No        | No   | No        |
| L13 | M   | 68  | Yes     | No      | 26.20 | Yes      | No     | No        | No   | Yes       |
| L14 | F   | 55  | No      | No      | 21.76 | Yes      | No     | No        | No   | Yes       |
| L15 | M   | 54  | Yes     | No      | 28.33 | Yes      | No     | No        | No   | No        |
| L16 | M   | 54  | No      | Yes     | 23.69 | Yes      | No     | No        | No   | No        |
| L17 | M   | 62  | No      | No      | 22.98 | No       | No     | No        | No   | Yes       |
| L18 | F   | 69  | No      | No      | 29.92 | Yes      | No     | No        | No   | No        |
| L19 | M   | 59  | Yes     | No      | 25.21 | No       | No     | Yes       | No   | Yes       |
| L20 | M   | 66  | No      | No      | 16.44 | No       | Yes    | Yes       | No   | Yes       |
| L21 | M   | 61  | No      | No      | 23.01 | No       | No     | No        | No   | No        |
| L22 | M   | 63  | No      | No      | 23.91 | Yes      | No     | No        | No   | No        |
| L23 | F   | 78  | No      | No      | 20.53 | No       | No     | No        | No   | No        |
| L24 | F   | 69  | No      | No      | 20.42 | No       | No     | No        | No   | Yes       |
| L25 | F   | 58  | No      | No      | 25.83 | Yes      | Yes    | Yes       | No   | No        |
| L26 | M   | 63  | No      | No      | 26.30 | No       | No     | No        | No   | Yes       |
| L27 | F   | 61  | No      | No      | 25.92 | No       | No     | No        | No   | No        |
| L28 | M   | 70  | No      | No      | 25.47 | Yes      | No     | No        | No   | No        |

|     |   |    |     |     |       |     |     |     |     |     |
|-----|---|----|-----|-----|-------|-----|-----|-----|-----|-----|
| L29 | M | 71 | No  | No  | 33.00 | No  | Yes | Yes | No  | Yes |
| N01 | M | 67 | No  | No  | 20.61 | Yes | No  | No  | No  | No  |
| N02 | F | 58 | No  | No  | 25.36 | Yes | No  | No  | No  | No  |
| N03 | F | 60 | No  | No  | 33.01 | No  | Yes | No  | No  | No  |
| N04 | F | 79 | No  | No  | 20.94 | No  | No  | No  | No  | No  |
| N05 | F | 78 | No  | No  | 26.83 | Yes | Yes | No  | No  | No  |
| N06 | F | 52 | Yes | Yes | 22.85 | Yes | No  | No  | No  | Yes |
| N07 | M | 58 | No  | No  | 36.11 | Yes | No  | Yes | No  | No  |
| N08 | F | 55 | No  | No  | 19.82 | Yes | No  | No  | Yes | No  |
| N09 | M | 66 | Yes | Yes | 29.58 | No  | No  | No  | No  | No  |
| N10 | F | 61 | No  | No  | 23.50 | No  | Yes | No  | No  | Yes |
| N11 | M | 45 | Yes | No  | 15.06 | No  | No  | No  | No  | No  |
| N12 | M | 55 | No  | No  | 29.52 | No  | No  | No  | No  | Yes |
| N13 | M | 76 | No  | No  | 23.52 | Yes | No  | No  | No  | Yes |
| N14 | F | 82 | No  | No  | 23.49 | Yes | Yes | No  | No  | Yes |
| N15 | M | 52 | No  | No  | 20.22 | No  | Yes | No  | No  | Yes |
| N16 | F | 78 | No  | No  | 22.51 | Yes | No  | Yes | No  | Yes |
| N17 | F | 74 | No  | No  | 26.53 | No  | No  | No  | No  | Yes |
| N18 | M | 56 | No  | No  | 25.19 | Yes | No  | No  | No  | Yes |
| N19 | M | 89 | No  | No  | 24.29 | No  | No  | No  | No  | No  |
| N20 | F | 80 | No  | No  | 27.53 | No  | No  | No  | No  | Yes |
| N21 | M | 66 | No  | No  | 27.49 | No  | No  | No  | No  | No  |
| N22 | F | 54 | No  | No  | 29.63 | No  | No  | No  | No  | No  |
| N23 | M | 73 | Yes | No  | 23.23 | Yes | Yes | No  | No  | No  |
| N24 | F | 73 | No  | No  | 26.33 | No  | No  | No  | No  | Yes |
| N25 | M | 57 | No  | No  | 22.03 | No  | No  | No  | No  | Yes |
| N26 | F | 60 | No  | No  | 30.13 | Yes | No  | No  | No  | Yes |
| N27 | M | 51 | No  | No  | 29.72 | No  | No  | No  | No  | Yes |
| N28 | F | 50 | No  | No  | 32.32 | Yes | No  | No  | No  | Yes |
| N29 | F | 65 | No  | No  | 21.77 | No  | No  | No  | Yes | No  |
| N30 | M | 65 | No  | No  | 23.70 | Yes | No  | No  | No  | Yes |

Table S1. Clinical features of recruited individuals in the three mouthwash groups (PID starting with C, L, and N, respectively).

| Sample | Raw PE reads | Merged reads | Long merged reads | Aligned and filtered reads |
|--------|--------------|--------------|-------------------|----------------------------|
| C01A   | 57508        | 55133        | 55103             | 49901                      |
| C01B   | 62804        | 60042        | 60006             | 53312                      |
| C02A   | 66544        | 63608        | 63498             | 58185                      |
| C02B   | 90964        | 86544        | 86392             | 78163                      |
| C03A   | 90919        | 87228        | 87096             | 79361                      |
| C03B   | 78865        | 75236        | 74988             | 67887                      |
| C04A   | 56398        | 52628        | 51464             | 47290                      |
| C04B   | 60942        | 57551        | 57463             | 51844                      |
| C05A   | 57737        | 55422        | 55231             | 50918                      |
| C05B   | 56805        | 54561        | 54515             | 50071                      |
| C06A   | 53705        | 51003        | 50517             | 47060                      |
| C06B   | 56266        | 53525        | 53094             | 49000                      |
| C07A   | 43574        | 41282        | 40642             | 37535                      |
| C07B   | 55815        | 53241        | 53164             | 48524                      |
| C08A   | 54843        | 52357        | 52338             | 47620                      |
| C08B   | 54489        | 52049        | 52034             | 47233                      |
| C09A   | 80571        | 78094        | 77762             | 71503                      |
| C09B   | 113958       | 109745       | 109254            | 99844                      |
| C10A   | 91061        | 87888        | 87765             | 80333                      |
| C10B   | 99985        | 96381        | 96271             | 87931                      |
| C11A   | 62927        | 60625        | 60580             | 56650                      |
| C11B   | 85778        | 81751        | 81537             | 74980                      |
| C12A   | 118974       | 114028       | 113358            | 105586                     |
| C12B   | 78974        | 74455        | 73549             | 68457                      |
| C13A   | 87905        | 84274        | 84155             | 78256                      |

|      |        |        |        |        |
|------|--------|--------|--------|--------|
| C13B | 73615  | 70709  | 70622  | 65946  |
| C14A | 56730  | 54250  | 53385  | 49809  |
| C14B | 57980  | 55477  | 55419  | 51361  |
| C15A | 72873  | 70318  | 70223  | 64285  |
| C15B | 86876  | 83931  | 83859  | 77728  |
| C16A | 86477  | 82677  | 82616  | 75287  |
| C16B | 102694 | 98155  | 98097  | 88678  |
| C17A | 114793 | 108452 | 108181 | 97728  |
| C17B | 87247  | 82586  | 82555  | 75853  |
| C18A | 105233 | 100550 | 99320  | 87821  |
| C18B | 136679 | 131167 | 131091 | 119181 |
| C19A | 72528  | 69034  | 68350  | 65208  |
| C19B | 90856  | 87625  | 86999  | 75119  |
| C20A | 108742 | 104359 | 104331 | 93752  |
| C20B | 122084 | 116209 | 116185 | 101349 |
| C21A | 71643  | 68666  | 68637  | 62933  |
| C21B | 107939 | 102717 | 102631 | 93568  |
| C22A | 75119  | 72791  | 72508  | 68275  |
| C22B | 106412 | 102506 | 102326 | 93801  |
| C23A | 76721  | 73396  | 73161  | 68135  |
| C23B | 80924  | 77511  | 77001  | 71309  |
| C24A | 78461  | 74490  | 74242  | 66910  |
| C24B | 99443  | 95594  | 95341  | 85340  |
| C25A | 91129  | 86906  | 86819  | 78806  |
| C25B | 84383  | 80818  | 80691  | 73658  |
| C26A | 84103  | 80403  | 79996  | 74769  |
| C26B | 70473  | 67512  | 67217  | 64461  |
| C27A | 85954  | 82072  | 81676  | 74816  |
| C27B | 84831  | 81240  | 81177  | 70704  |
| C28A | 69835  | 66120  | 63963  | 59964  |
| C28B | 71454  | 68338  | 67461  | 62887  |
| L01A | 47469  | 45672  | 45527  | 41643  |
| L01B | 73794  | 70356  | 70201  | 65632  |
| L02A | 71315  | 67862  | 67834  | 59969  |
| L02B | 69776  | 66463  | 66450  | 58747  |
| L03A | 62981  | 60153  | 59900  | 56980  |
| L03B | 64013  | 60947  | 60928  | 53220  |
| L04A | 63979  | 60904  | 60886  | 55580  |
| L04B | 56334  | 53742  | 53698  | 49111  |
| L05A | 56508  | 53052  | 52988  | 48837  |
| L05B | 58913  | 56265  | 56229  | 51787  |
| L06A | 61467  | 58819  | 58673  | 53756  |
| L06B | 60192  | 56849  | 56503  | 51441  |
| L07A | 59375  | 56356  | 56285  | 50673  |
| L07B | 42453  | 40563  | 40525  | 37049  |
| L08A | 54356  | 51921  | 51874  | 47588  |
| L08B | 63922  | 60550  | 60475  | 54522  |
| L09A | 81258  | 77084  | 74755  | 68858  |
| L09B | 80499  | 77018  | 76364  | 71620  |
| L10A | 100877 | 97066  | 97006  | 88879  |
| L10B | 101076 | 96960  | 96905  | 88668  |
| L11A | 89847  | 86373  | 86320  | 79068  |
| L11B | 65773  | 63062  | 62982  | 57102  |
| L12A | 93410  | 89117  | 88562  | 80310  |
| L12B | 87549  | 83886  | 83772  | 76287  |
| L13A | 71346  | 68690  | 68164  | 62589  |
| L13B | 79692  | 76425  | 76251  | 69660  |
| L14A | 62247  | 59115  | 58519  | 53139  |
| L14B | 93117  | 89191  | 89099  | 80869  |
| L15A | 66980  | 64137  | 64108  | 59000  |
| L15B | 55595  | 53178  | 53157  | 49126  |
| L16A | 85846  | 81303  | 81236  | 74515  |
| L16B | 80996  | 77592  | 77515  | 70812  |
| L17A | 114359 | 108579 | 108549 | 99995  |

|      |        |        |        |        |
|------|--------|--------|--------|--------|
| L17B | 98117  | 93081  | 93006  | 85909  |
| L18A | 149160 | 141358 | 141269 | 130214 |
| L18B | 92610  | 87905  | 87834  | 81262  |
| L19A | 89181  | 85179  | 84997  | 75320  |
| L19B | 61759  | 58894  | 58147  | 54665  |
| L20A | 147321 | 139150 | 139134 | 126643 |
| L20B | 149333 | 143141 | 143093 | 127404 |
| L21A | 94609  | 91637  | 91539  | 83524  |
| L21B | 73457  | 71050  | 70814  | 65738  |
| L22A | 81683  | 78264  | 78201  | 70642  |
| L22B | 101101 | 97095  | 96907  | 83653  |
| L23A | 109204 | 105156 | 104954 | 92670  |
| L23B | 93133  | 89965  | 89889  | 81886  |
| L24A | 72054  | 67480  | 66941  | 64042  |
| L24B | 77252  | 73728  | 73198  | 66941  |
| L25A | 74079  | 71635  | 71432  | 64133  |
| L25B | 79560  | 76540  | 76487  | 68751  |
| L26A | 77129  | 73352  | 73281  | 66665  |
| L26B | 86542  | 82528  | 82193  | 74914  |
| L27A | 75465  | 71706  | 71563  | 65965  |
| L27B | 83302  | 78547  | 78068  | 73234  |
| L28A | 79336  | 76452  | 76370  | 68604  |
| L28B | 108405 | 103100 | 103009 | 93730  |
| L29A | 77888  | 74151  | 74049  | 66238  |
| L29B | 79983  | 76963  | 76835  | 68843  |
| N01A | 78125  | 74841  | 74816  | 67519  |
| N01B | 68512  | 65723  | 65554  | 60342  |
| N02A | 76510  | 71903  | 70492  | 64073  |
| N02B | 71096  | 67716  | 67595  | 61392  |
| N03A | 80148  | 76953  | 76841  | 70260  |
| N03B | 89794  | 85547  | 85425  | 76647  |
| N04A | 69991  | 66980  | 66951  | 58428  |
| N04B | 65173  | 62276  | 62255  | 53456  |
| N05A | 58633  | 56306  | 56299  | 50713  |
| N05B | 52975  | 50416  | 50410  | 44609  |
| N06A | 60618  | 57857  | 56979  | 51857  |
| N06B | 65418  | 61888  | 61527  | 56422  |
| N07A | 73559  | 69895  | 69655  | 64149  |
| N07B | 61157  | 58221  | 58042  | 53488  |
| N08A | 58013  | 55279  | 55234  | 50101  |
| N08B | 54807  | 52076  | 52054  | 47172  |
| N09A | 76059  | 72206  | 72096  | 65688  |
| N09B | 63122  | 60167  | 60137  | 54299  |
| N10A | 97331  | 93928  | 93870  | 85979  |
| N10B | 102526 | 98928  | 98790  | 90030  |
| N11A | 121933 | 117718 | 117662 | 107786 |
| N11B | 70150  | 67317  | 66962  | 63073  |
| N12A | 68521  | 65457  | 64935  | 60954  |
| N12B | 71302  | 67478  | 65911  | 61897  |
| N13A | 105679 | 101618 | 101505 | 93847  |
| N13B | 106397 | 101685 | 101496 | 93499  |
| N14A | 61937  | 57790  | 56993  | 52268  |
| N14B | 93655  | 88338  | 87022  | 80280  |
| N15A | 79205  | 75332  | 74833  | 67039  |
| N15B | 102830 | 98216  | 97335  | 89125  |
| N16A | 105717 | 100858 | 100300 | 90225  |
| N16B | 90702  | 86220  | 85529  | 78791  |
| N17A | 68062  | 65032  | 65004  | 58902  |
| N17B | 68724  | 65396  | 65352  | 59106  |
| N18A | 69719  | 66629  | 66557  | 61736  |
| N18B | 115950 | 110246 | 110067 | 100297 |
| N19A | 71787  | 68726  | 68703  | 63251  |
| N19B | 91065  | 86640  | 86335  | 79541  |
| N20A | 100629 | 96670  | 96572  | 87108  |

|       |          |          |          |          |
|-------|----------|----------|----------|----------|
| N20B  | 129179   | 123480   | 123423   | 108612   |
| N21A  | 110504   | 105851   | 105826   | 97708    |
| N21B  | 103887   | 98997    | 98950    | 89121    |
| N22A  | 117812   | 113187   | 113136   | 101835   |
| N22B  | 104591   | 100400   | 100351   | 91697    |
| N23A  | 83080    | 79889    | 79788    | 73156    |
| N23B  | 84691    | 81716    | 81658    | 75225    |
| N24A  | 79622    | 76023    | 75816    | 72444    |
| N24B  | 87145    | 83289    | 82642    | 75061    |
| N25A  | 74419    | 71298    | 71139    | 66781    |
| N25B  | 87728    | 83271    | 80919    | 72019    |
| N26A  | 95932    | 91964    | 91883    | 82953    |
| N26B  | 97944    | 94303    | 94225    | 83925    |
| N27A  | 79686    | 76494    | 76421    | 70580    |
| N27B  | 66144    | 62969    | 62248    | 58577    |
| N28A  | 67479    | 64444    | 64016    | 58016    |
| N28B  | 81815    | 78502    | 78368    | 70764    |
| N29A  | 83360    | 80271    | 80249    | 74479    |
| N29B  | 83392    | 80452    | 80353    | 73545    |
| N30A  | 79022    | 75779    | 75642    | 67208    |
| N30B  | 74528    | 71585    | 71460    | 63991    |
| Total | 14181010 | 13553173 | 13505914 | 12318553 |

Table S2. Statistics of sequencing reads.

| phylum                      | coefficient | q-value |
|-----------------------------|-------------|---------|
| (a)                         |             |         |
| Fusobacteria                | -0.0112     | 0.0076  |
| Campilobacterota            | -0.0021     | 0.0325  |
| Candidatus.Saccharibacteria | -0.0011     | 0.0325  |
| Bacteroidetes               | -0.0319     | 0.0612  |
| (b)                         |             |         |
| Firmicutes                  | 0.0481      | 0.0211  |
| Bacteroidetes               | -0.0528     | 0.0211  |
| Spirochaetes                | -0.0029     | 0.0829  |
| Candidatus Saccharibacteria | -0.0014     | 0.0829  |

Table S3. Differentially abundant phyla after gargling (a) CHX and (b) LIS by MaAsLin2.

| pathway                                                    | lower | higher | p-value | q-value |
|------------------------------------------------------------|-------|--------|---------|---------|
| (a)                                                        |       |        |         |         |
| Epithelial cell signaling in Helicobacter pylori infection | 15    | 0      | 0.00006 | 0.00934 |
| Aminobenzoate degradation                                  | 3     | 19     | 0.00086 | 0.03937 |
| African trypanosomiasis                                    | 4     | 21     | 0.00091 | 0.03937 |
| D-Glutamine and D-glutamate metabolism                     | 16    | 2      | 0.00131 | 0.03937 |
| RNA polymerase                                             | 18    | 3      | 0.00149 | 0.03937 |
| Glutathione metabolism                                     | 4     | 20     | 0.00154 | 0.03937 |
| Spliceosome                                                | 15    | 2      | 0.00235 | 0.04972 |
| Steroid hormone biosynthesis                               | 19    | 4      | 0.00260 | 0.04972 |
| NOD-like receptor signaling pathway                        | 18    | 4      | 0.00434 | 0.06155 |
| Amoebiasis                                                 | 16    | 3      | 0.00443 | 0.06155 |
| Pantothenate and CoA biosynthesis                          | 16    | 3      | 0.00443 | 0.06155 |
| One carbon pool by folate                                  | 19    | 5      | 0.00661 | 0.08429 |
| Fluorobenzoate degradation                                 | 2     | 13     | 0.00739 | 0.08692 |
| Bacterial chemotaxis                                       | 20    | 6      | 0.00936 | 0.08946 |
| Flagellar assembly                                         | 20    | 6      | 0.00936 | 0.08946 |
| Lipopolysaccharide biosynthesis                            | 20    | 6      | 0.00936 | 0.08946 |

|                                             |    |    |         |         |
|---------------------------------------------|----|----|---------|---------|
| Polycyclic aromatic hydrocarbon degradation | 4  | 16 | 0.01182 | 0.10636 |
| Plant-pathogen interaction                  | 12 | 2  | 0.01294 | 0.10999 |
| Riboflavin metabolism                       | 19 | 6  | 0.01463 | 0.11243 |
| Biosynthesis of unsaturated fatty acids     | 5  | 17 | 0.01690 | 0.11243 |
| Pyruvate metabolism                         | 5  | 17 | 0.01690 | 0.11243 |
| Terpenoid backbone biosynthesis             | 17 | 5  | 0.01690 | 0.11243 |
| Tryptophan metabolism                       | 5  | 17 | 0.01690 | 0.11243 |
| Photosynthesis - antenna proteins           | 3  | 13 | 0.02127 | 0.13148 |
| Endocytosis                                 | 9  | 1  | 0.02148 | 0.13148 |
| Two-component system                        | 5  | 16 | 0.02660 | 0.15655 |
| (b)                                         |    |    |         |         |
| Glycerolipid metabolism                     | 4  | 18 | 0.00434 | 0.18593 |
| Vitamin B6 metabolism                       | 18 | 4  | 0.00434 | 0.18593 |
| Sulfur metabolism                           | 6  | 21 | 0.00592 | 0.18593 |
| Photosynthesis                              | 5  | 19 | 0.00661 | 0.18593 |
| Selenocompound metabolism                   | 5  | 19 | 0.00661 | 0.18593 |
| Carbon fixation in photosynthetic organisms | 17 | 4  | 0.00720 | 0.18593 |

Table S4. Consistent differentially abundant pathways in mouthwash groups (a) C and (b) L. Columns 2 and 3 indicate numbers of individuals showing a lower and higher pathway abundance after gargling the mouthwash. Columns 4 and 5 show the binomial test p-values and the corrected q-values.

## Supplementary Figures

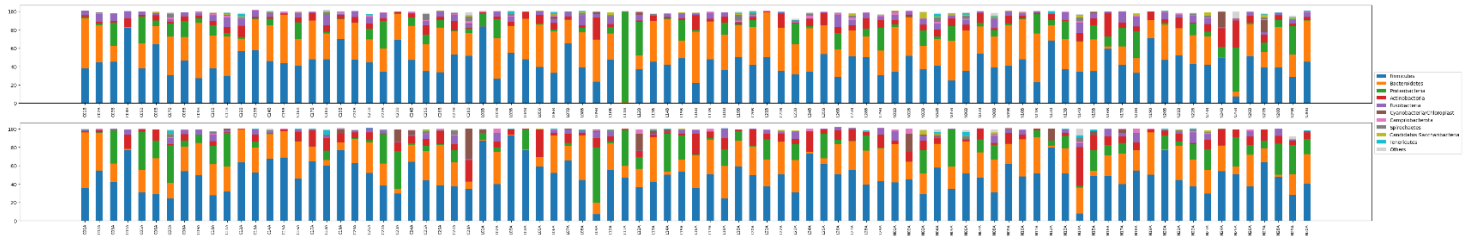

Figure S1. Compositions of top ten abundant phyla in all samples before (top) and after (bottom) gargling. Samples of three mouthwash groups C, L, and N are placed on the left, middle, and right.

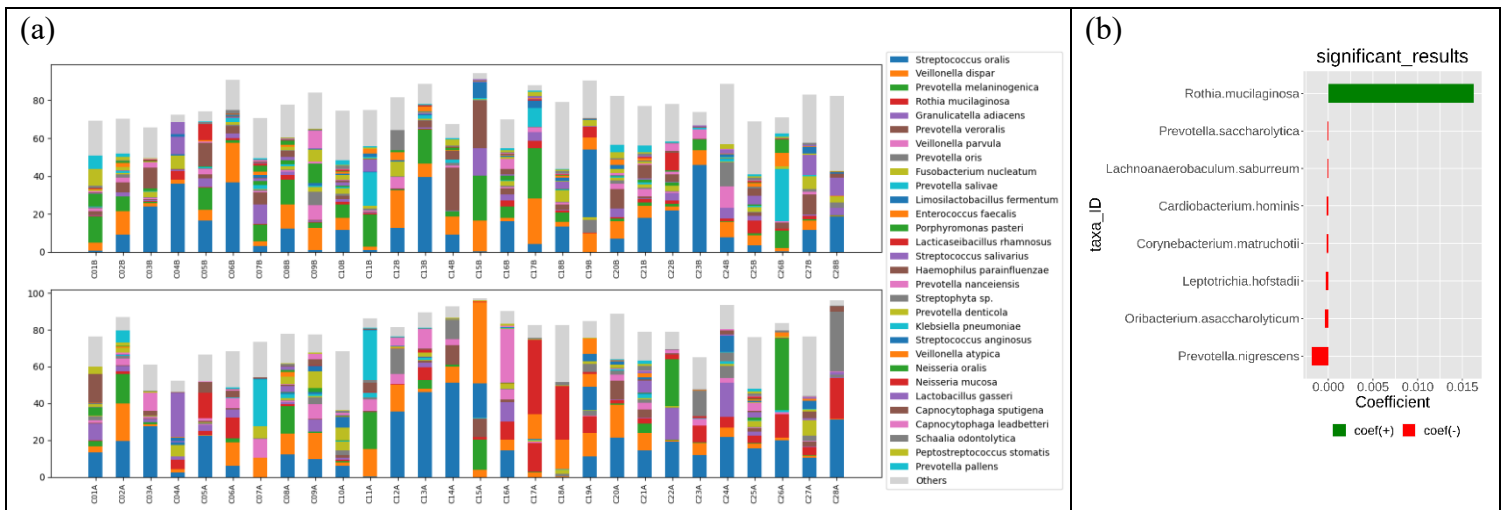

Figure S2. (a) Compositions of top 30 abundant species in oral samples of group C before (top) and after (bottom) gargling, and (b) differentially abundant species.

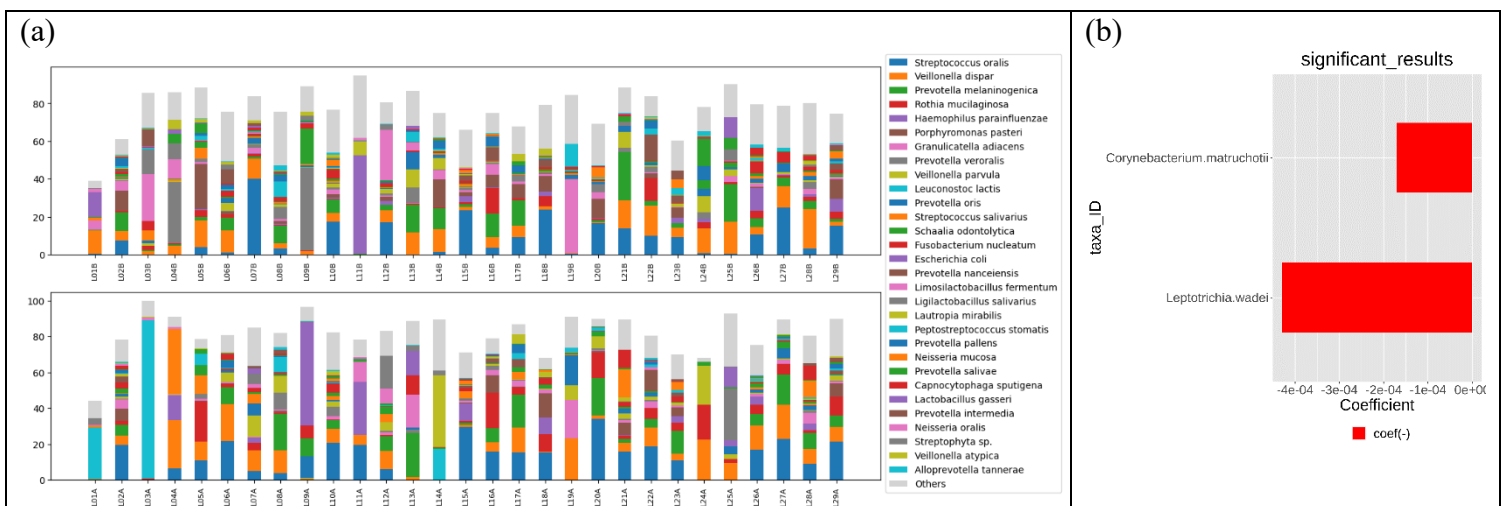

Figure S3. (a) Compositions of top 30 abundant species in oral samples of group L before (top) and after (bottom) gargling, and (b) differentially abundant species.

(a) (b)

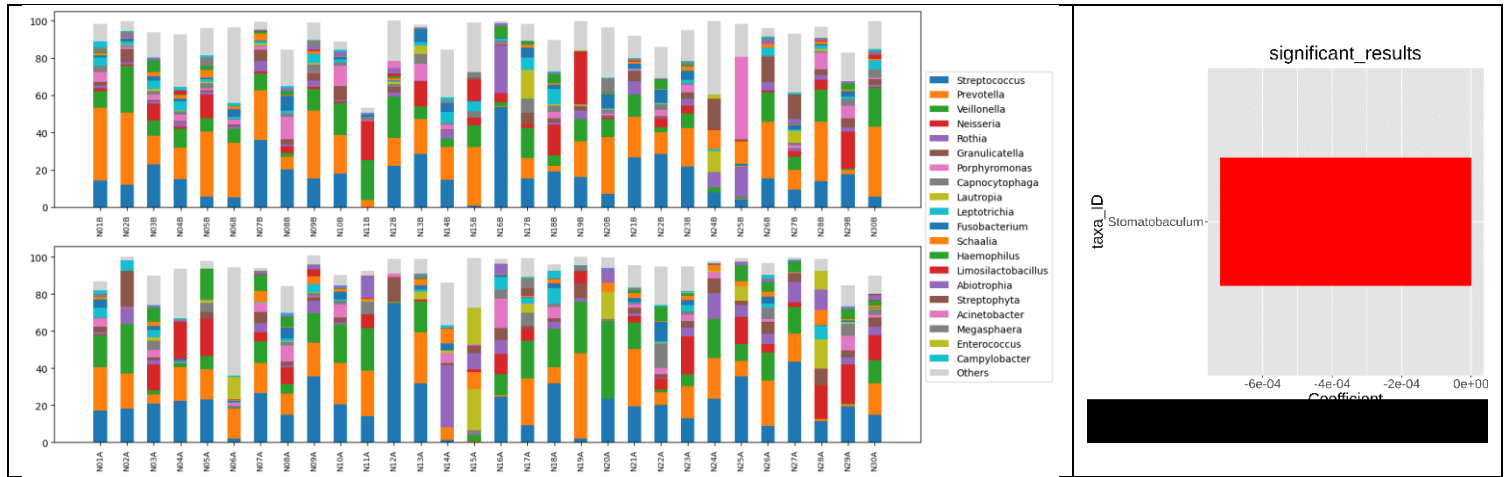

Figure S4. (a) Compositions of top 20 abundant genera in oral samples of group N before (top) and after (bottom) gargling, and (b) differentially abundant genus.

**Significant associations ( $-\log(\text{qval}) \cdot \text{sign}(\text{coeff})$ )**

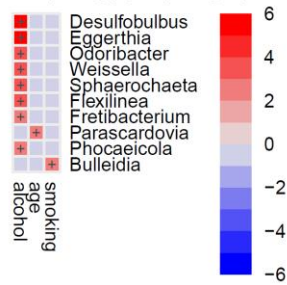

Figure S5. Microbial genera associated with clinical features.
